# Supplementary material for: EPuL: An Enhanced Positive-Unlabeled Learning Algorithm for the Prediction of Pupylation Sites
Source: PubMed Central journal article supplement (PMC6151806; doi:10.3390/molecules22091463), 2017-09-05
Supplement: molecules-22-01463-s001.pdf [file molecules-22-01463-s001.pdf]

### Top 150 k-spaced amino acid pairs

|        |        |        |        |        |       |
|--------|--------|--------|--------|--------|-------|
| DxxxxE | LxK    | FxxK   | MxxxxE | WxV    | LC    |
| VxxxxR | DxD    | MxxxxK | MxxxxA | HxN    | VxxC  |
| ExE    | GxxxY  | SxxxxS | MxxE   | TxxM   | HY    |
| VxxN   | VxxxxS | ExxxxH | CG     | HxxxT  | FxxxH |
| Vxxxx_ | IxP    | PxxxxA | AxxxxN | KC     | GxC   |
| Vxxx_  | ExxxxL | VN     | RxxxM  | DxxxxH | PxxW  |
| AxxxT  | AxxxxD | VxxY   | FxxxN  | VxxxC  | SxxxW |
| VxD    | FxD    | GxxxxR | MxxT   | ExC    | IxxxW |
| ExV    | NI     | TxxxL  | PxxQ   | NxxQ   | NxxxM |
| LE     | AxxxE  | DxxI   | QY     | TxxW   | PxxC  |
| SxxxxE | KP     | GxM    | QxxxxP | MxxxP  | CxK   |
| ExxxK  | LxG    | HxxxK  | HxxxI  | NxxxH  | ExR   |
| _xQ    | YxxxK  | HxG    | QxxxN  | PxxxxH | ExL   |
| T_     | KxxxxA | MxxxK  | FxxF   | CA     | CxxE  |
| FD     | KxK    | IxxxxI | WxxA   | CxxA   | ExN   |
| VV     | IS     | YxP    | IxxM   | FxxxY  | TxL   |
| ExA    | GxxK   | GxxxM  | HxxxS  | CxxxxK | ExM   |
| DxxxR  | YK     | TxxxH  | VxxxW  | CxxxxA | TxR   |
| Dxxxx_ | NxxG   | KxM    | PxxM   | TxxxxW | ExK   |
| DxxF   | LK     | HD     | AC     | CxL    | ExP   |
| VD     | MxxxxA | RxH    | TxM    | CxA    | ExQ   |
| LxxA   | MxE    | YxxY   | MxxI   | CV     | ExG   |
| KxxxS  | TxK    | PM     | _xxxA  | CxxxI  | ExT   |
| ExxxxE | LxxP   | MxG    | RxxxxH | IxxxxM | CxxQ  |
| AA     | IxH    | PxxF   | MxxP   | NxM    | CxxP  |
